# Supplementary material
Source: MDPI journal article supplement (https://www.mdpi.com/2313-576X/8/1/2)
Supplement: s1 [file s1 › safety-1481032-supplementary.pdf]

# Supplementary Materials: Reversing Poor Safety Records: Identifying Best Practices to Improve Fleet Safety

Matthew C. Camden, Jeffrey S. Hickman and Richard J. Hanowski

**Table S1.** Haddon Matrix of CMV Safety Best Practices.

|                    | Pre-crash                                                                                                                                                                                                                                                                                                                                                                                                                                                                                                                                                                                                                                                                                                                                                                                | At the Scene                                                                      | Post-Crash                                                                                                                                                                                                                           |
|--------------------|------------------------------------------------------------------------------------------------------------------------------------------------------------------------------------------------------------------------------------------------------------------------------------------------------------------------------------------------------------------------------------------------------------------------------------------------------------------------------------------------------------------------------------------------------------------------------------------------------------------------------------------------------------------------------------------------------------------------------------------------------------------------------------------|-----------------------------------------------------------------------------------|--------------------------------------------------------------------------------------------------------------------------------------------------------------------------------------------------------------------------------------|
| Vehicle            | <ul style="list-style-type: none"> <li>• AEB</li> <li>• LDW</li> <li>• Blind spot warning</li> <li>• RSC/ESC</li> <li>• Speed telematic technology</li> <li>• Speed limiters</li> <li>• VOBMS</li> <li>• Systematic checks for wear</li> <li>• Preventive maintenance</li> <li>• Equipment repair at first notice</li> <li>• Systematic post-trip inspections</li> <li>• Load-specific equipment inspections</li> </ul>                                                                                                                                                                                                                                                                                                                                                                  | -                                                                                 | <ul style="list-style-type: none"> <li>• Post-crash vehicle repair or replacement</li> </ul>                                                                                                                                         |
| People             | <ul style="list-style-type: none"> <li>• Use FMCSA's PSP</li> <li>• Requirements for previous experience</li> <li>• On-the-job training for all hires</li> <li>• Finishing program for all new drivers</li> <li>• Driver mentoring program</li> <li>• Face-to-face interviews for all hires</li> <li>• Strict hiring criteria related to previous crash involvement</li> <li>• Strict hiring criteria for previous violations/citations</li> <li>• Employer referrals</li> <li>• Driving simulator for safety assessments</li> <li>• Driving simulator for training</li> <li>• Online training</li> <li>• Hair testing for drugs/alcohol</li> <li>• Additional physical fitness/agility test</li> <li>• Regular in-person safety briefings</li> <li>• VOBMS coaching sessions</li> </ul> | -                                                                                 | <ul style="list-style-type: none"> <li>• One-on-one driver training post-crash</li> <li>• Progressive discipline with respect to crash causation</li> <li>• Health and wellness medical visits</li> </ul>                            |
| Environment        | <ul style="list-style-type: none"> <li>• Safety pledge signage in terminals</li> <li>• Analyze routes for an average 45 mph</li> <li>• Mandate vehicle stops in bad weather</li> <li>• Schedule routes in relation to individual sleep preferences</li> <li>• Real-time driving time monitoring</li> </ul>                                                                                                                                                                                                                                                                                                                                                                                                                                                                               | -                                                                                 | -                                                                                                                                                                                                                                    |
| Management Culture | <ul style="list-style-type: none"> <li>• Safety pledge</li> <li>• Safety awards: non-monetary</li> <li>• Safety awards: monetary</li> <li>• Recurring and frequent communication on safety</li> </ul>                                                                                                                                                                                                                                                                                                                                                                                                                                                                                                                                                                                    | <ul style="list-style-type: none"> <li>• Driver support at crash scene</li> </ul> | <ul style="list-style-type: none"> <li>• VOBMS to identify root cause</li> <li>• VOBMS for driver exonerations</li> <li>• Data recording for safety analyzes and benchmarking</li> <li>• Driver incident reporting system</li> </ul> |

- 
- Non-confrontational coaching
  - Open door communication policies
  - Full-time driver trainers
  - Leadership buy-in
  - Zero tolerance for HOS violations
  - Leadership safety communication
  - Driver scorecards
  - Family-involved events
  - Family safety education
  - Family organizational culture
  - Progressive discipline
  - Safety benchmarking
  - Transparency with fleetwide crash data
  - Transparency with fleetwide cost data
  - Fleetwide safety accountability
  - Wellness checks
  - Comprehensive driver health and wellness programs
  - Driver collaboration
-
